# Supplementary material for: Mechanical Properties of a 3D Printed Wall Segment Made with an Earthen Mixture
Source: Preprints.org preprint supplement (doi:10.20944/preprints202112.0357.v1), 2021-12-22
Supplement: Supplementary file 2 [file supplementary]

Archive with 2 entries (2 files):
- Supplementary material.pdf
- wall_paper.pdf
